# Supplementary material for: In situ evolution of bulk-active γ-CoOOH with immobilized Gd dopants enabling efficient oxygen evolution electrocatalysis
Source: Royal Society of Chemistry journal article supplement (doi:10.1039/d4nr01743a), 2024-01-01
Supplement: d4nr01743a1.pdf [file d4nr01743a1.pdf]

# Supporting Information

## ***In-situ* evolution of bulk-active $\gamma$ -CoOOH with immobilized Gd dopants enabling an efficient oxygen evolution electrocatalysis**

*Tianjue Hou, Ruotao Yang, Jiaxin Xu, Xiaodie He, Hongyuan Yang, Prashanth W. Menezes\* and Ziliang Chen\**

## Figures

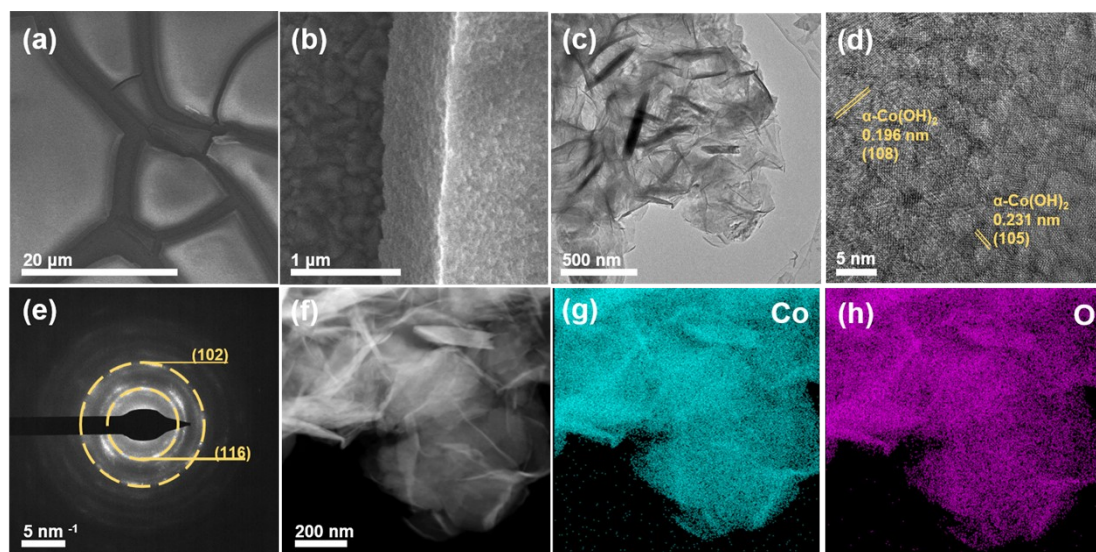

**Fig. S1.** (a, b) The FESEM images of  $\alpha$ -Co(OH)<sub>2</sub>/FTO. (c) The TEM images, (d) HRTEM image, and (e) SAED pattern together with the corresponding (f) HAADF pattern as well as the elemental mapping of (g) Co and (h) O for the  $\alpha$ -Co(OH)<sub>2</sub> peeled from the FTO substrate.

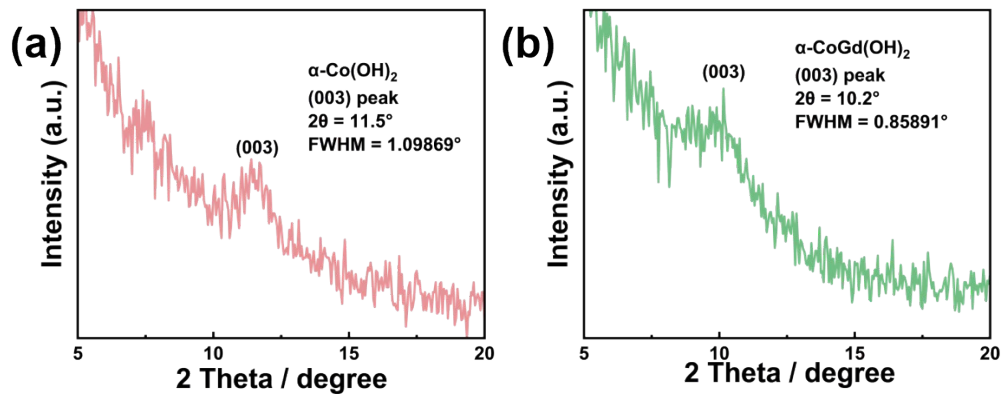

**Fig. S2.** The XRD patterns with 2 theta values below  $10^\circ$  for  $\alpha\text{-Co(OH)}_2$  and  $\alpha\text{-CoGd(OH)}_2$  together with the full width at half maximum (FWHM) analysis on their respective (003) peak.

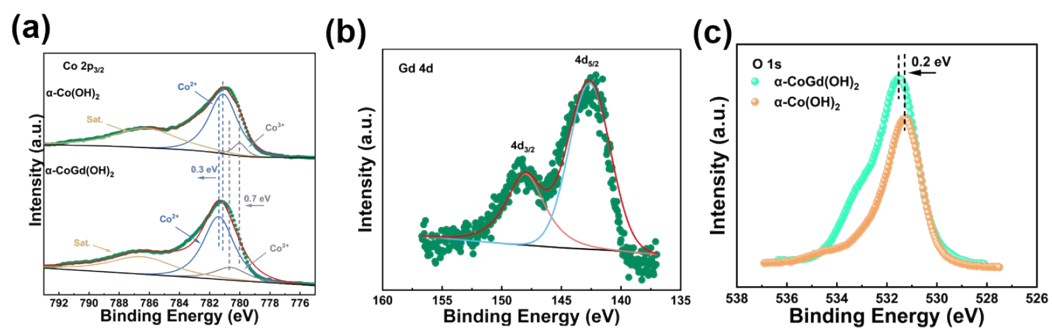

**Fig. S3.** The XPS spectra of (a) Co 2p<sub>3/2</sub> for  $\alpha$ -CoGd(OH)<sub>2</sub>/FTO and  $\alpha$ -Co(OH)<sub>2</sub>/FTO, (b) Gd 4d for  $\alpha$ -CoGd(OH)<sub>2</sub>/FTO, as well as (c) O 1s for  $\alpha$ -CoGd(OH)<sub>2</sub>/FTO and  $\alpha$ -Co(OH)<sub>2</sub>/FTO, respectively.

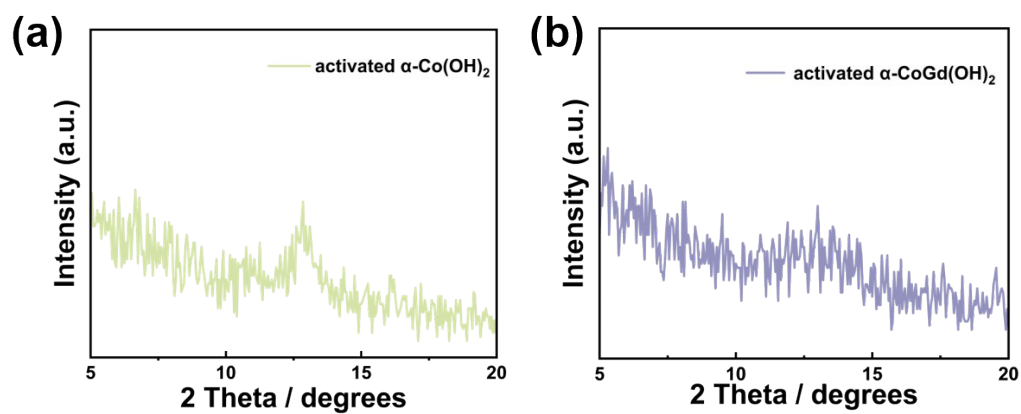

**Fig. S4.** The powder XRD patterns of the activated  $\alpha$ -Co(OH)<sub>2</sub> and  $\alpha$ -CoGd(OH)<sub>2</sub>, respectively, recorded using the Grazing incidence (GI) mode. Note that the beam-knife was also employed to minimize air scattering at the low 2 theta region.

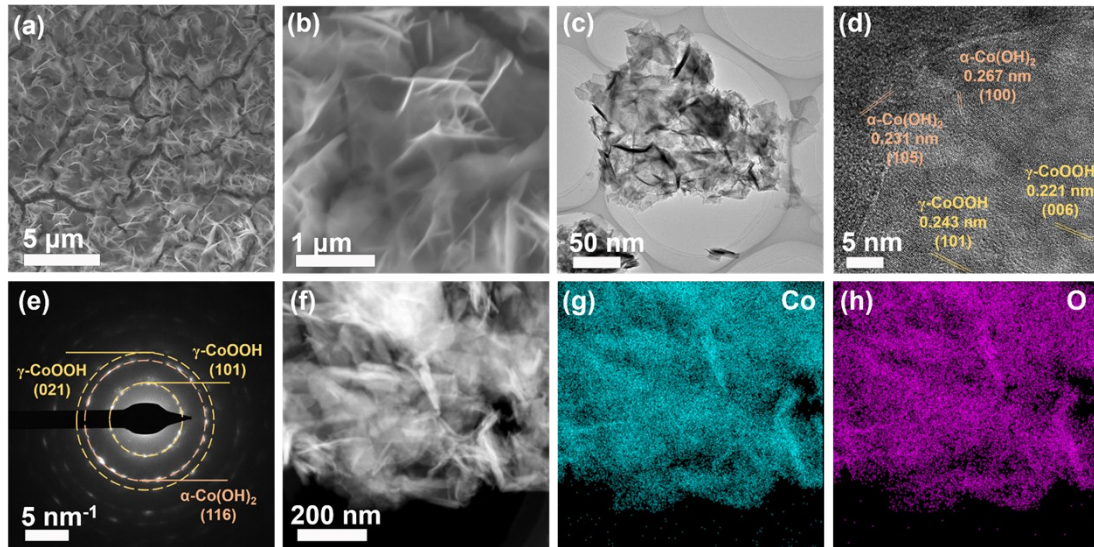

**Fig. S5.** (a, b) The FESEM images of  $\alpha$ -Co(OH)<sub>2</sub>/FTO after activation. (c) The TEM images, (d) HRTEM image, and (e) SAED pattern together with the corresponding (f) HAADF pattern as well as the elemental mapping of (g) Co and (h) O for the  $\alpha$ -Co(OH)<sub>2</sub> after activation (peeled from the FTO substrate).

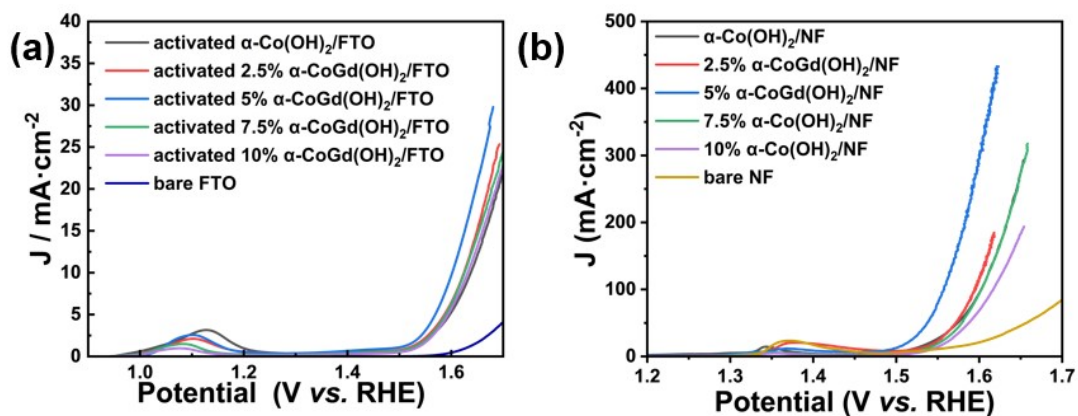

**Fig. S6.** The LSV curves of (a) the FTO- and (b) NF-supported 2.5%  $\alpha$ -CoGd(OH)<sub>2</sub>, 5%  $\alpha$ -CoGd(OH)<sub>2</sub>, 7.5%  $\alpha$ -CoGd(OH)<sub>2</sub>, and 10%  $\alpha$ -CoGd(OH)<sub>2</sub>. Herein,  $\alpha$ -Co(OH)<sub>2</sub> was incorporated with different amounts of Gd, which was prepared by adjusting the molar ratio between Co and Gd sources, ranging from 0.975 : 0.025, 0.95 : 0.05, 0.925 : 0.075, to 0.9 : 0.1. Note that the (a) bare FTO and (b) NF, as well as the bare  $\alpha$ -Co(OH)<sub>2</sub> deposited on (a) FTO and (b) NF were also included. The LSV curves of all the samples were recorded after 20 CV activations.

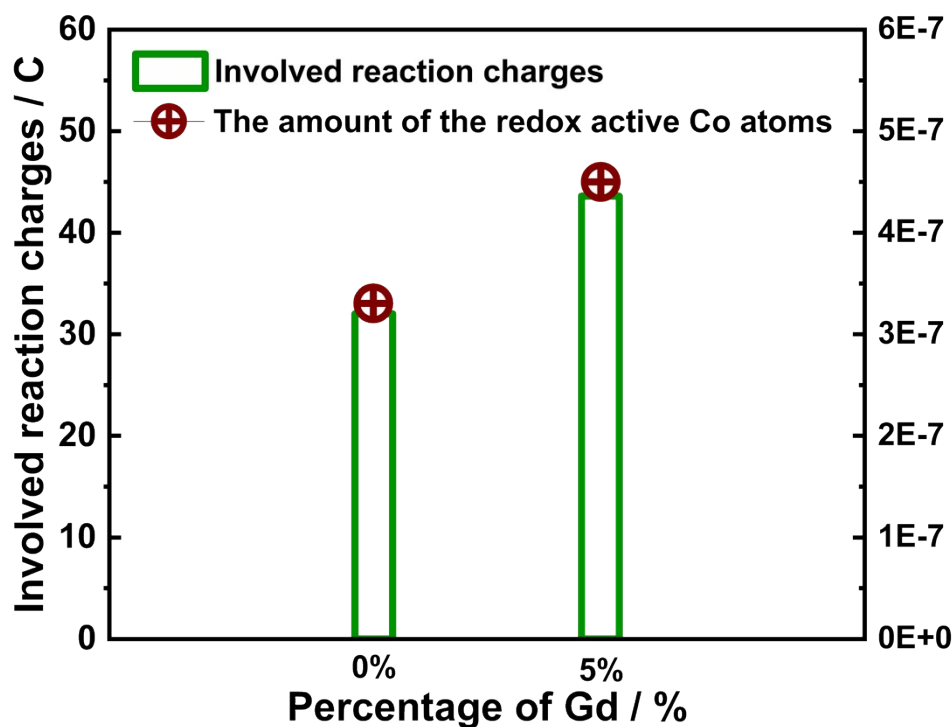

**Fig. S7.** The correlation between the solution ratio of chemical deposition and the number of active sites. The integration of reduction peaks of  $\alpha$ -Co(OH)<sub>2</sub> and  $\alpha$ -CoGd(OH)<sub>2</sub> in the same potential region for the calculation of the amount of electroactive Co atoms. The observed reduction peak can be attributed to the conversion of Co<sup>3+</sup> ions into Co<sup>2+</sup> ions, whose area for  $\alpha$ -Co(OH)<sub>2</sub> and  $\alpha$ -CoGd(OH)<sub>2</sub> were 0.16011 mV·A cm<sup>-1</sup> and 0.21805 mV·A cm<sup>-1</sup>, respectively, as shown in Fig. 5c. Therefore, the involved reaction charge for  $\alpha$ -Co(OH)<sub>2</sub> and  $\alpha$ -CoGd(OH)<sub>2</sub> can be calculated through the equation: involved reaction charges (C) = integrated area of reduction peak (V A) / scan rate (V s<sup>-1</sup>). Furthermore, following to the equation: the number of transferred electrons = involved reaction charges (C) / charge of an electron ( $1.602 \times 10^{-19}$  C), The number of the transferred electrons for  $\alpha$ -Co(OH)<sub>2</sub> and  $\alpha$ -CoGd(OH)<sub>2</sub> can be determined. Since the corresponding process involves a single electron transfer, the number of transferred electrons aligns with the number of active Co atoms, thus enabling us to draw this conclusion.



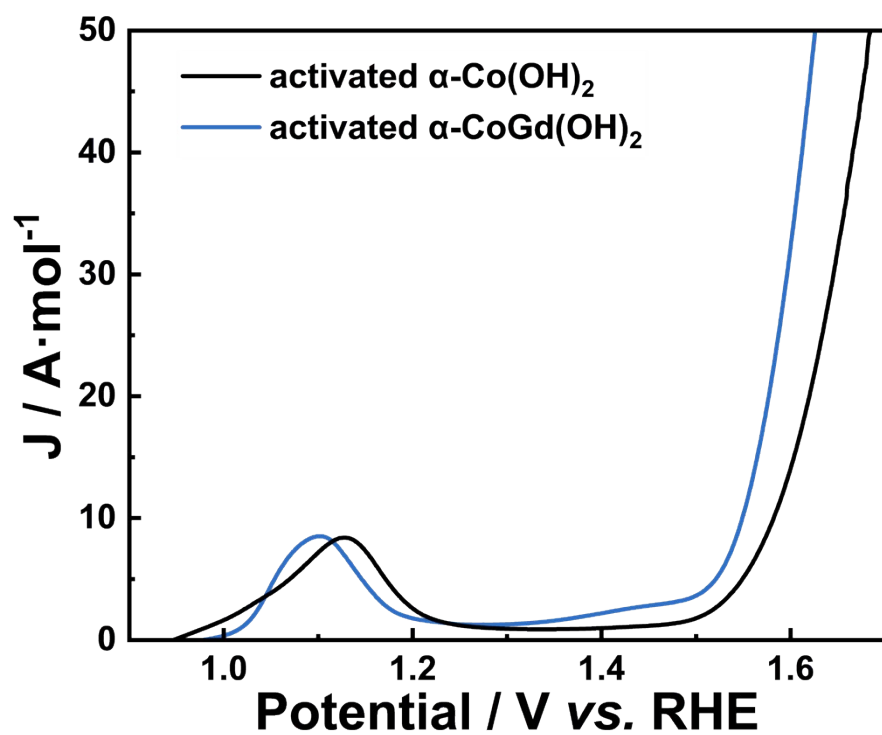

**Fig. S8.** The current from the LSV data in Fig. 5a of the main text normalized against the number of the redox active Co atoms.

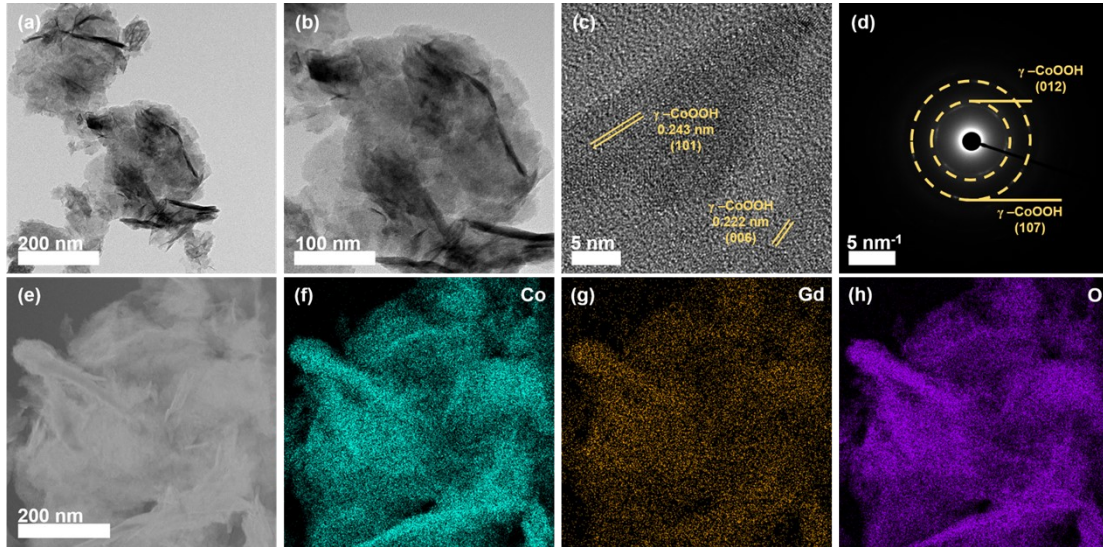

**Fig. S9.** (a, b) The TEM images, (c) HRTEM image, and (d) SAED pattern together with the corresponding (e) HAADF pattern as well as the elemental mapping of (f) Co, (g) Gd, and (h) O for the activated  $\alpha$ -CoGd(OH)<sub>2</sub> after 24 h CA at a current density of  $\sim 10 \text{ mA cm}^{-2}$  (peeled from the FTO substrate).

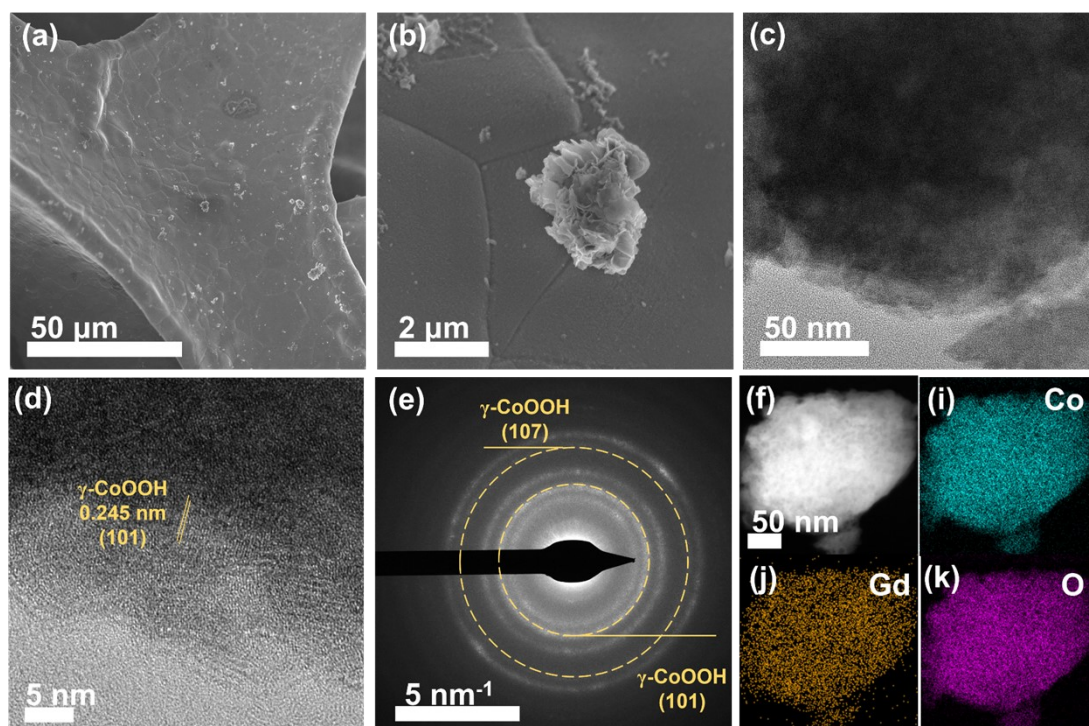

**Fig. S10.** (a, b) The FESEM images of  $\alpha$ -CoGd(OH)<sub>2</sub>/NF. (c) The TEM images, (d) HRTEM image, and (e) SAED pattern together with the corresponding (f) HAADF pattern as well as the elemental mapping of (g) Co, (h) Gd, and (i) O for the activated  $\alpha$ -CoGd(OH)<sub>2</sub> peeled from the NF substrate.

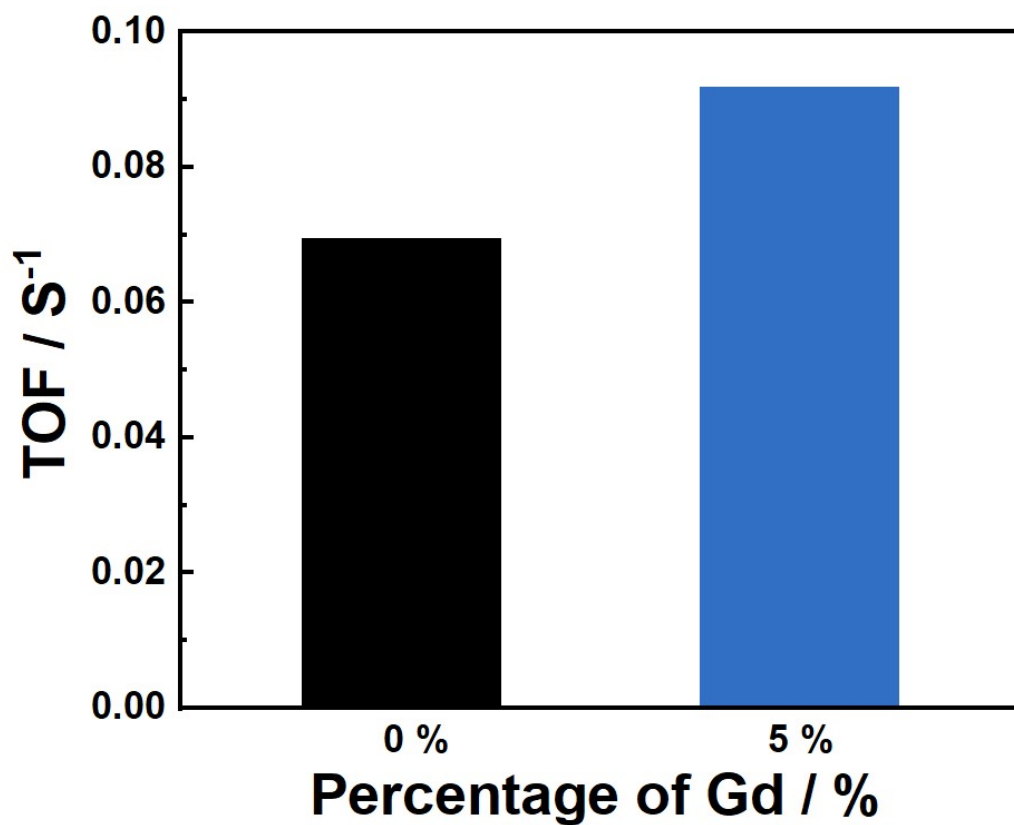

**Fig. S11.** The turnover frequency (TOF) of activated  $\alpha$ -Co(OH)<sub>2</sub> and  $\alpha$ -CoGd(OH)<sub>2</sub> at the overpotential of 400 mV.<sup>1</sup>  $\text{TOF} = j \cdot N_A / F \cdot n \cdot \Gamma$  where  $j$  is the current density,  $N_A$  is the Avogadro number,  $n$  is the number of electrons transferred for the evolution of a single O<sub>2</sub> molecule,  $F$  is the Faraday constant, and  $\Gamma$  is the surface concentration or the number of active Co sites.

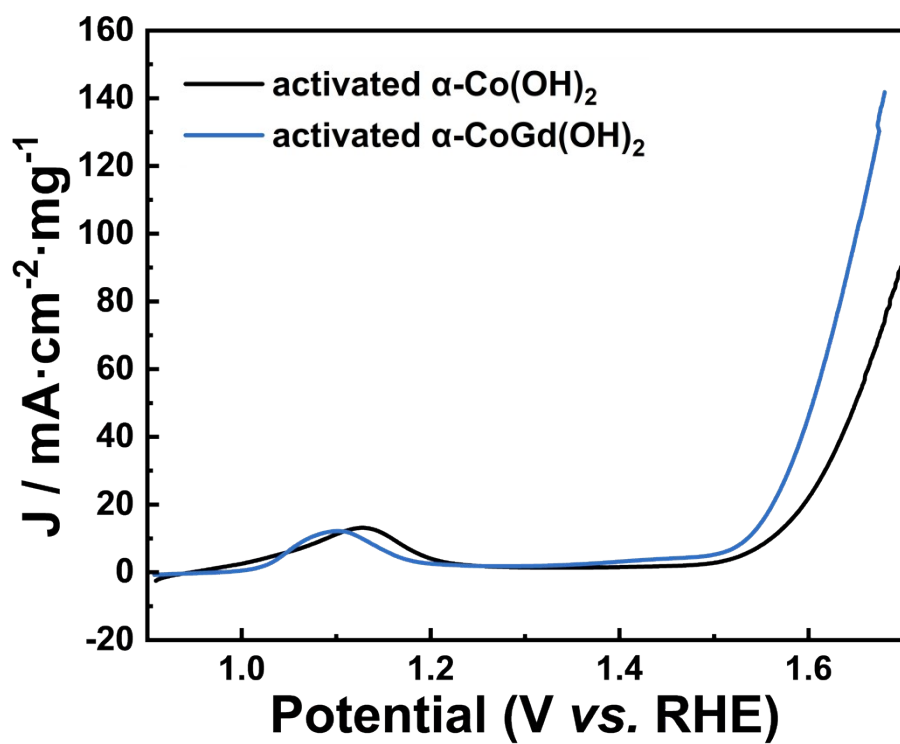

**Fig. S12.** The current from the LSV data in Fig. 5a of the main text normalized against the mass of the deposited catalyst.<sup>2</sup>

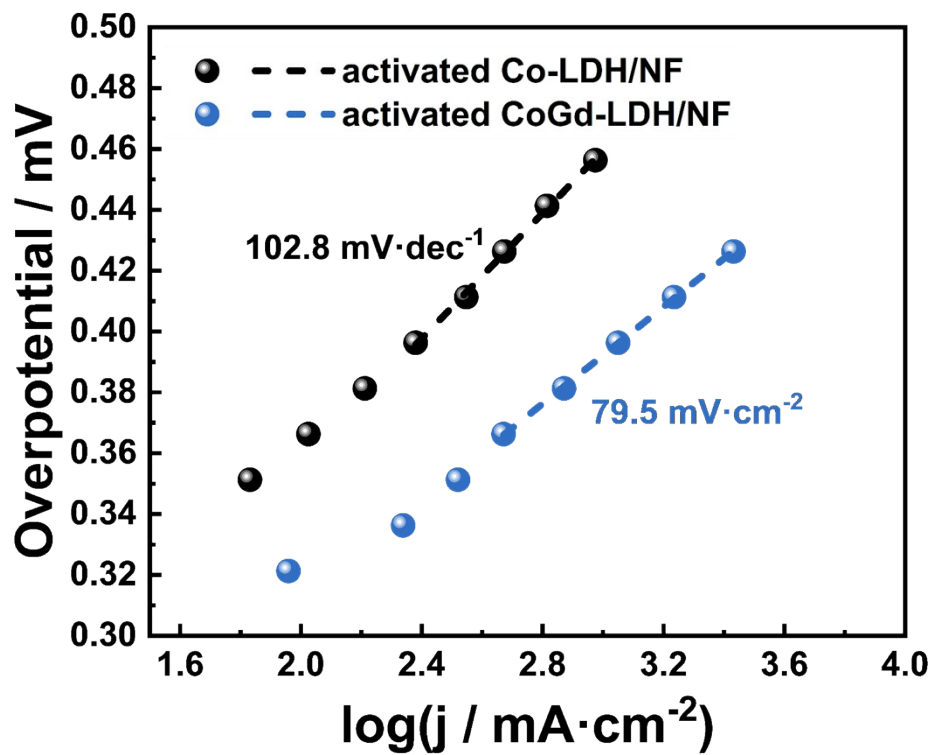

**Fig. S13.** The Tafel slope plots of the activated  $\alpha$ -CoGd(OH)<sub>2</sub>/NF and  $\alpha$ -Co(OH)<sub>2</sub>/NF determined by the steady-state method.

## Tables

**Table S1.** The atomic ratio of Co and Gd for  $\alpha$ -CoGd(OH)<sub>2</sub>/FTO determined by EDS.

| Atomic ratio         | Co    | Gd |
|----------------------|-------|----|
| Fresh samples        | 11.07 | 1  |
| After activation     | 13.27 | 1  |
| After stability test | 13.12 | 1  |

**Table S2.** The atomic ratio of Co and Gd for  $\alpha$ -CoGd(OH)<sub>2</sub>/FTO determined by ICP analysis.

| Atomic ratio         | Co    | Gd |
|----------------------|-------|----|
| Fresh samples        | 11.90 | 1  |
| After stability test | 12.26 | 1  |

**Table S3.**  $R_{ct}$  ( $\Omega$ ),  $R_s$  ( $\Omega$ ), CPE ( $F \times s(a_2-1)$ ) and  $a_2$  of the catalysts deposited on FTO and NF obtained from EIS fitting at an anodic polarization potential of 1.6 V (vs. RHE) and from EIS fitting at an anodic polarization potential of 1.55 V (vs. RHE), respectively.

|                                                  | <b>Activated <math>\alpha</math>-Co(OH)<sub>2</sub>/FTO</b> | <b>Activated <math>\alpha</math>-CoGd(OH)<sub>2</sub>/FTO</b> |
|--------------------------------------------------|-------------------------------------------------------------|---------------------------------------------------------------|
| <b><math>R_{ct}</math> (<math>\Omega</math>)</b> | 61.05                                                       | 21.94                                                         |
| <b><math>R_s</math> (<math>\Omega</math>)</b>    | 10.86                                                       | 12.1                                                          |
| <b>CPE</b>                                       | 0.04036                                                     | 0.06428                                                       |
| <b><math>a_2</math></b>                          | 0.9261                                                      | 0.8539                                                        |
|                                                  |                                                             |                                                               |
|                                                  | <b>Activated <math>\alpha</math>-Co(OH)<sub>2</sub>/NF</b>  | <b>Activated <math>\alpha</math>-CoGd(OH)<sub>2</sub>/NF</b>  |
| <b><math>R_{ct}</math> (<math>\Omega</math>)</b> | 4.523                                                       | 2.85                                                          |
| <b><math>R_s</math> (<math>\Omega</math>)</b>    | 1.191                                                       | 1.061                                                         |
| <b>CPE</b>                                       | 0.1551                                                      | 0.3178                                                        |
| <b><math>a_2</math></b>                          | 0.9209                                                      | 0.883                                                         |



**Table S4.** The overpotential to deliver a current density of  $\sim 100 \text{ mA cm}^{-2}$  and tafel slope comparison between  $\alpha\text{-CoGd(OH)}_2/\text{NF}$  and other recently reported advanced Co-based catalysts supported on NF for alkaline OER.

|                                                                       |                                           |                                      |           |
|-----------------------------------------------------------------------|-------------------------------------------|--------------------------------------|-----------|
| NiCoS nanorods                                                        | 370 mV                                    | 130 $\text{mV}\cdot\text{dec}^{-1}$  | 3         |
| CoO nanowires                                                         | 415 mV                                    | 72 $\text{mV}\cdot\text{dec}^{-1}$   | 4         |
| Co-P particles                                                        | 380 mV                                    | 51.1 $\text{mV}\cdot\text{dec}^{-1}$ | 5         |
| 3D $\text{Co(OH)}_2@\text{NCST}$                                      | 410 mV                                    | 72 $\text{mV}\cdot\text{dec}^{-1}$   | 6         |
| NiCoP nanocone                                                        | 370 mV                                    | 116 $\text{mV}\cdot\text{dec}^{-1}$  | 7         |
| Fe-doped (Ni,Mn)Co nanorods                                           | 331 mV                                    | 67.8 $\text{mV}\cdot\text{dec}^{-1}$ | 8         |
| Fe-Co-Ni-S <sub>x</sub>                                               | 409 mV                                    | 93 $\text{mV}\cdot\text{dec}^{-1}$   | 9         |
| NiCoP@NC NA                                                           | 339 mV                                    | 70.5 $\text{mV}\cdot\text{dec}^{-1}$ | 10        |
| Mo-doped CoP nanosheet                                                | 330 mV                                    | 69.1 $\text{mV}\cdot\text{dec}^{-1}$ | 11        |
| N-C inserted NiCo-LDH nanoplates                                      | 352 mV @ $50\text{mA}\cdot\text{cm}^{-1}$ | 80.1 $\text{mV}\cdot\text{dec}^{-1}$ | 12        |
| NiA-Co(OH) <sub>2</sub> film                                          | 410 mV                                    | 82 $\text{mV}\cdot\text{dec}^{-1}$   | 13        |
| spheres like spinel oxide $\text{CoFe}_2\text{O}_4$                   | 400 mV                                    | 78 $\text{mV}\cdot\text{dec}^{-1}$   | 14        |
| $\text{Co}_{0.4}(\text{Hatz})_{0.1}(\text{H4bta})_{0.1}$ nanoclusters | 311 mV                                    | 84 $\text{mV}\cdot\text{dec}^{-1}$   | 15        |
| Ni-Co-S nanosheets                                                    | 363 mV                                    | 86 $\text{mV}\cdot\text{dec}^{-1}$   | 16        |
| branch like NiCoS                                                     | 410 mV                                    | 64.7 $\text{mV}\cdot\text{dec}^{-1}$ | 17        |
| Gd-doped $\gamma\text{-CoOOH}$ nanosheets                             | 327 mV                                    | 79.5 $\text{mV}\cdot\text{dec}^{-1}$ | this work |

## Reference

1. S. Anantharaj, P. E. Karthik and S. Noda, *Angew. Chem. Int. Ed.*, 2021, **60**, 23051–23067.
2. L. Yu, S. Sun, H. Li and Z. J. Xu, *Funda. Re.*, 2021, **1**, 448–452.
3. K. Yan, X. Shang, Z. Li, B. Dong, J. Chi, Y. Liu, W. Gao, Y. Chai and C. Liu, *Int. J. Hydrogen Energy*, 2017, **42**, 17129–17135.
4. S. Zhu, J. Lei, L. Zhang and J. He, *In. J. Hydrogen Energy*, 2020, **45**, 8031–8040.
5. Z. Lv, Y. Zhang, K. Wang, T. Yu, X. Liu, G. Wang, G. Xie and L. Jiang, *Mater. Chem. Phys.*, 2019, **235**, 121772.
6. P. Guo, J. Wu, X. Li, J. Luo, W. Lau, H. Liu, X. Sun and L. Liu, *Nano Energy*, 2018, **47**, 96–104.
7. J. Li, G. Wei, Y. Zhu, Y. Xi, X. Pan, Y. Ji, I. V. Zatonvsky and W. Han, *J. Mater. Chem. A*, 2017, **5**, 14828–14837.
8. H. Shi, Q. Zha and Y. Ni, *J. Alloys Compd*, 2022, **904**, 164052.
9. S. Zhu, J. Lei, S. Wu, L. Liu, T. Chen, Y. Yuan and C. Ding, *Mater. Lett.*, 2022, **311**, 131549.
10. B. Cao, Y. Cheng, M. Hu, P. Jing, Z. Ma, B. Liu, R. Gao and J. Zhang, *Adv. Funct. Mater.*, 2019, **29**, 1906316.
11. S. Li, L. Bai, H. Shi, X. Hao, L. Chen, X. Qin and G. Shao, *Ionics*, 2021, **27**, 3109–3118.
12. Z. Jia, J. Shang, K. Xue, X. Yang, S. Wang, C. Xu and Q. Wang, *ChemCatChem*, 2023, **15**, e202201469 .
13. K. Patil, P. Babar, D. Lee, V. Karade, E. Jo, S. Korde and J. Kim, *Sustain. Energ. Fuels*, 2020, **4**, 5254-5263
14. S. Zhu, J. Lei, Y. Qin, L. Zhang and L. Lu, *RSC Adv.*, 2019, **9**, 13269–13274.
15. Z. Huang, L. Hao, X. Ma, S. Zhang, R. Zhang, K. Yue and Y. Wang, *Inorg. Chem.*, 2021, **60**, 4047–4057.
16. T. Liu, X. Sun, A. M. Asiri and Y. He, *Int. J. Hydrogen Energy*, 2016, **41**, 7264–7269.
17. Y. Zhang, L. Lin, J. Liu, J. Peng, Z. Chen and L. Chen, *Int. J. Hydrogen Energy*, 2021, **46**, 36629–36639.
